# Supplementary material for: Age, Sex, and Disease-Specific Mortality Contributions to Life Expectancy in Urban and Rural China, 1987–2021
Source: PubMed Central journal article supplement — China CDC Wkly. 2024 Jul 12;6(28):684–8. doi: 10.46234/ccdcw2024.154 (PMC11255607; doi:10.46234/ccdcw2024.154), 2024-07-12
Supplement: ccdcw-6-28-684-S1.pdf [file ccdcw-6-28-684-S1.pdf]

**SUPPLEMENTARY MATERIAL**

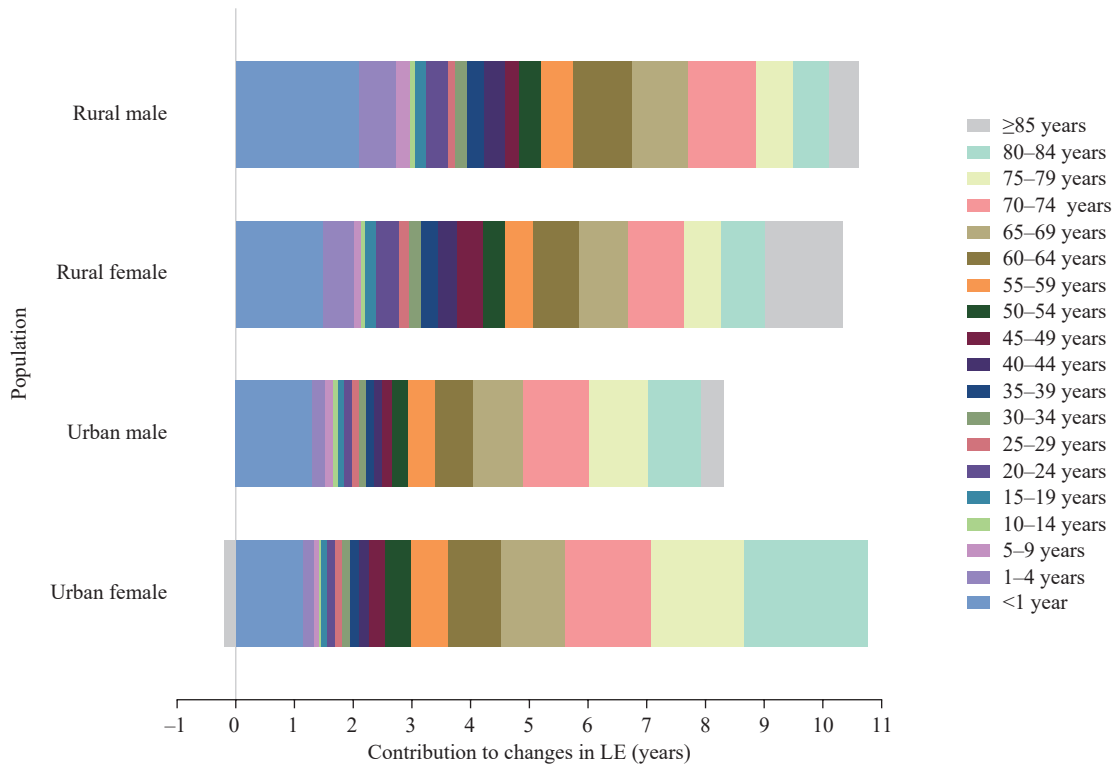

SUPPLEMENTARY FIGURE S1. Contributions of different age groups to life expectancy changes in urban and rural areas in China in 1987 and 2021, categorized by 5-year intervals.  
Abbreviation: LE=life expectancy.
